# Supplementary material for: Neutralization of SARS-CoV-2 spike pseudotyped virus by recombinant ACE2-Ig
Source: Springer Nature journal article supplement (doi:10.1038/s41467-020-16048-4), 2020-04-24
Supplement: 41467_2020_16048_MOESM1_ESM.pdf [file 41467_2020_16048_MOESM1_ESM.pdf]

**Supplementary Information for**  
Neutralization of SARS-CoV-2 spike pseudotyped virus by  
recombinant ACE2-Ig  
*Lei et al*

## Supplementary Figures

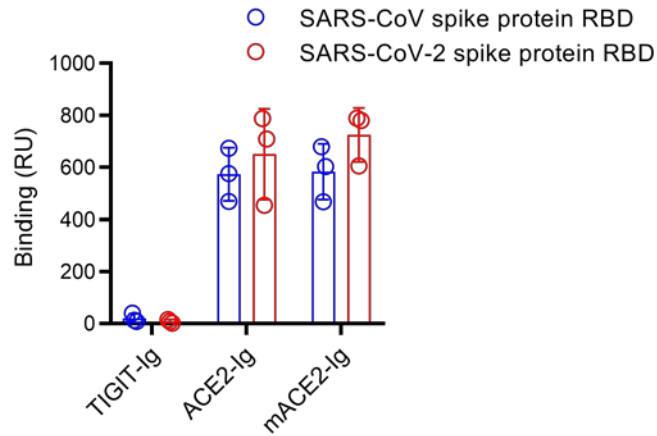

### **Supplementary Figure 1. Binding of Fusion proteins to CoV spike protein RBDs.**

Fusion proteins were tested for binding to immobilized CoV spike protein RBDs using surface plasmon resonance on a BIAcore 2000 instrument. Binding was quantified as an increase in RU at 60 s after the end of injection compared with a baseline established 20 s before injection. Data are the means  $\pm$  s.d. of three independent biological replicates. Source data are provided as a Source Data file.

Figure S2

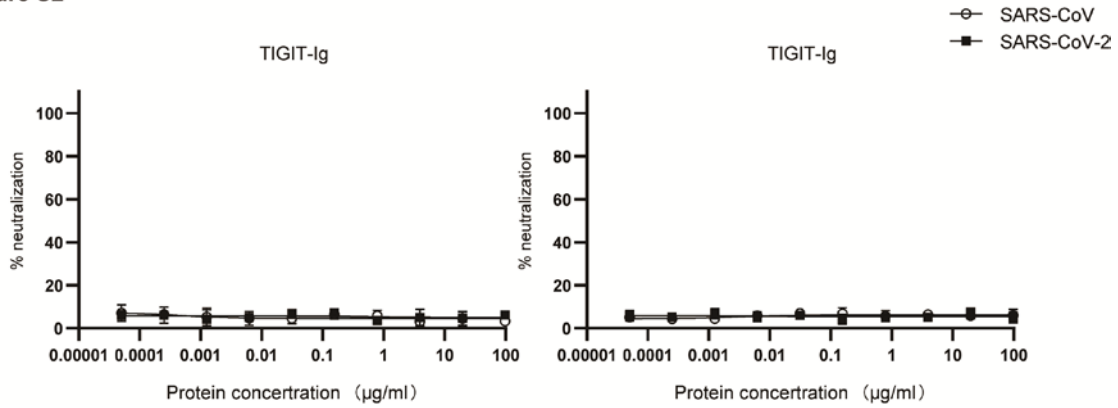

**Supplementary Figure 2. No neutralization effect of TIGIT-Ig.** HIVs pseudotyped with the S glycoproteins from CoVs were incubated with TIGIT-Ig for 1 h before infection. Luciferase activities in target 293T cells (left) and A549 cells (right) were measured, and the percent neutralization was calculated. Data are the means  $\pm$  s.d. of four independent biological replicates. Source data are provided as a Source Data file.

## Supplementary Table 1. Sequences of ACE2-Ig

| Name     | Amino acid sequence                                                                                                                                                                                                                                                                                                                                                                                                                                                                                                                                                                                                                                                                                                                                                                                                                                                                                                                                                                                                                                                                                                                       |
|----------|-------------------------------------------------------------------------------------------------------------------------------------------------------------------------------------------------------------------------------------------------------------------------------------------------------------------------------------------------------------------------------------------------------------------------------------------------------------------------------------------------------------------------------------------------------------------------------------------------------------------------------------------------------------------------------------------------------------------------------------------------------------------------------------------------------------------------------------------------------------------------------------------------------------------------------------------------------------------------------------------------------------------------------------------------------------------------------------------------------------------------------------------|
| ACE2-Ig  | <p> MSSSSWLLLSLVAVTAAQSTIEEQAKTFLDKFNHEAEDLFYQSSLASWN<br/> YNTNITEENVQNMNAGDKWSAFLKEQSTLAQMYPLQEIQNLTVKLQ<br/> LQALQQNGSSVLSSEKSKRLNTILNTMSTIYSTGKVCNPDNPQECLELLE<br/> PGLNEIMANSLDYNERLWAWESWRSEVGKQLRPLYEEYVVLKNEMAR<br/> ANHVEDYGDYWRGDYEVNGVDGYDYSRGLIEDVEHTFEEIKPLYEH<br/> LHAYVRAKLMNAYPSYISPIGCLPAHLLGDMWGRFWTNLYSLTVPFGQ<br/> KPNIDVTDAMVDQAWDAQRIFKEAEKFFVSVGLPNMTQGFWENSMLT<br/> DPGNVQKAVCHPTAWDLGKGDFRILMCTKVTMDDFLTAHHEMIGHIQY<br/> DMAYAAQPFLLRNGANEGFHEAVGEIMSLSAATPKHLKSIGLLSPDFQE<br/> DNETEINFLLKQALTIVGTLPTFTYMLEKWRWMVFKGEIPKDQWMKKW<br/> WEMKREIVGVVEPVPHDETYCDPASLFHVSNDYSFIRYYTRTLYQFQFQ<br/> EALCQAAKHEGPHLKCINSTEAGQKLFNMLRLGKSEPWTALENVV<br/> GAKNMNVRPLLNYFEPLFTWLKDQNKNSFVWSTWSPYADQSIKVR<br/> ISLKSALGDKAYEWNENEMYLFRSSVAYAMRQYFLKVKNQMILFGEED<br/> VRVANLKPRISFNFFVTAPKNVSDIIPRTEVEKAIRMSRSRINDAFRLNDN<br/> SLEFLGIQPTLGPPNQPPVSEPKSCDKTHTCPPCPAPELGGPSVFLFPPK<br/> PKDTLMISRTPEVTCVVVDVSHEDPEVKFNWYVDGVEVHNAKTKPRE<br/> EQYNSTYRVVSVLTVLHQDWLNGKEYKCKVSNKALPAPIEKTISKAKG<br/> QPREPQVYTLPPSRDELTKNQVSLTCLVKGFYPSDIAVEWESNGQPENN<br/> YKTTTPVLDSDGSAFLYSLKLTVDKSRWQQGNVFSCSVMHEALHNHYTQ<br/> KSLSLSPGK </p> |
| mACE2-Ig | <p> MSSSSWLLLSLVAVTAAQSTIEEQAKTFLDKFNHEAEDLFYQSSLASWN<br/> YNTNITEENVQNMNAGDKWSAFLKEQSTLAQMYPLQEIQNLTVKLQ<br/> LQALQQNGSSVLSSEKSKRLNTILNTMSTIYSTGKVCNPDNPQECLELLE<br/> PGLNEIMANSLDYNERLWAWESWRSEVGKQLRPLYEEYVVLKNEMAR<br/> ANHVEDYGDYWRGDYEVNGVDGYDYSRGLIEDVEHTFEEIKPLYEH<br/> LHAYVRAKLMNAYPSYISPIGCLPAHLLGDMWGRFWTNLYSLTVPFGQ<br/> KPNIDVTDAMVDQAWDAQRIFKEAEKFFVSVGLPNMTQGFWENSMLT<br/> DPGNVQKAVCHPTAWDLGKGDFRILMCTKVTMDDFLTAHREMGRIOY<br/> DMAYAAQPFLLRNGANEGFHEAVGEIMSLSAATPKHLKSIGLLSPDFQE<br/> DNETEINFLLKQALTIVGTLPTFTYMLEKWRWMVFKGEIPKDQWMKKW<br/> WEMKREIVGVVEPVPHDETYCDPASLFHVSNDYSFIRYYTRTLYQFQFQ<br/> EALCQAAKHEGPHLKCINSTEAGQKLFNMLRLGKSEPWTALENVV<br/> GAKNMNVRPLLNYFEPLFTWLKDQNKNSFVWSTWSPYADQSIKVR<br/> ISLKSALGDKAYEWNENEMYLFRSSVAYAMRQYFLKVKNQMILFGEED<br/> VRVANLKPRISFNFFVTAPKNVSDIIPRTEVEKAIRMSRSRINDAFRLNDN<br/> SLEFLGIQPTLGPPNQPPVSEPKSCDKTHTCPPCPAPELGGPSVFLFPPK<br/> PKDTLMISRTPEVTCVVVDVSHEDPEVKFNWYVDGVEVHNAKTKPRE<br/> EQYNSTYRVVSVLTVLHQDWLNGKEYKCKVSNKALPAPIEKTISKAKG<br/> QPREPQVYTLPPSRDELTKNQVSLTCLVKGFYPSDIAVEWESNGQPENN<br/> YKTTTPVLDSDGSAFLYSLKLTVDKSRWQQGNVFSCSVMHEALHNHYTQ<br/> KSLSLSPGK </p>  |

**Supplementary Table 2. Selected analytical data and pharmacokinetic parameters of recombinant fusion proteins.**

| Parameter <sup>a</sup>                               | ACE-Ig | mACE2-Ig | TIGIT-Ig |
|------------------------------------------------------|--------|----------|----------|
| HMW formation after storage(% SEC area) <sup>b</sup> | < 0.1  | < 0.1    | < 0.1    |
| LMW formation after storage(% SEC area) <sup>b</sup> | < 0.1  | < 0.1    | < 0.1    |
| AUC (day $\mu\text{g ml}^{-1}$ )                     | 540.8  | 464.3    | 557.2    |
| $T_{1/2}$ (day)                                      | 5.2    | 5.3      | 4.7      |
| CL (ml day <sup>-1</sup> kg <sup>-1</sup> )          | 7.2    | 8.5      | 7.3      |
| VSS(ml kg <sup>-1</sup> )                            | 68.3   | 78.0     | 65.6     |

<sup>a</sup> Pharmacokinetic parameters were calculated using a noncompartmental analysis. AUC, area under the concentration versus time curve;  $t_{1/2}$ , half-life; CL, clearance; VSS, steady-state volume of distribution.

<sup>b</sup> Quiescent storage for 1 wk, 40 °C, 1 mg/mL
