# Supplementary material for: Neutralization of SARS-CoV-2 spike pseudotyped virus by recombinant ACE2-Ig
Source: Nat Commun. 2020 Apr 24;11:2070. doi: 10.1038/s41467-020-16048-4 (PMC7265355; doi:10.1038/s41467-020-16048-4)
Supplement: Supplementary file 4 — Source Data [file 41467_2020_16048_MOESM4_ESM.xls]

## Sheet: Figure 2
Figure 2a
Neutralization activity of ACE2-Ig in 293T/ACE2 cells
% Neutralization
	ACE2-Ig								mACE2-Ig
μg/ml	SARS-CoV				SARS-CoV-2				SARS-CoV				SARS-CoV-2
5e-05	5.226	3.886	4.094	4.971	2.951	4.169	6.177	4.682	4.879	4.933	4.514	4.42	6.047	4.981	4.313	4.949
0.00025	6.146	5.832	5.039	4.717	5.32	6.308	6.467	7.01	4.225	2.987	5.455	3.578	3.696	5.809	5.589	5.883
0.00125	4.311	6.882	7.231	5.785	18.602	21.656	15.808	22.762	4.346	6.203	6.383	4.082	18.644	20.256	25.671	18.177
0.00625	11.856	11.348	9.393	8.979	22.928	28.873	28.482	18.158	12.115	8.145	10.881	10.987	21.95	20.793	24.745	22.978
0.0313	17.356	16.853	15.622	16.57	46.996	34.078	21.073	43.469	24.278	27.822	20.345	19.485	67.572	55.644	42.626	45.157
0.156	17.509	32.84	22.862	19.265	75.844	89.527	72.786	78.148	24.89	27.664	18.23	24.552	75.379	84.857	75.904	93.656
0.781	56.425	53.393	45.002	44.748	82.997	78.659	82.687	91.922	39.387	52.323	50.373	64.613	98.5	94.671	83.948	99.312
3.91	73.075	79.116	98.531	77.577	99.3	93.332	95.167	95.195	73.2	68.234	71.418	58.789	98.472	99.45	96.735	99.276
1.95	95.281	89.357	85.992	97.915	93.737	99.365	99.006	99.833	88.883	92.593	96.013	99.467	99.699	93.411	99.817	99.523
9.77	90.822	99.561	89.671	90.85	99.195	98.84	94.917	94.755	97.426	99.086	97.236	95.83	96.048	97.042	99.167	98.347
Figure 2b
Neutralization activity of ACE2-Ig in A549/ACE2 cells
% Neutralization
	ACE2-Ig								mACE2-Ig
μg/ml	SARS-CoV				SARS-CoV-2				SARS-CoV				SARS-CoV-2
5e-05	8.96	6.549	2.821	6.428	3.696	5.893	9.053	10.678	7.806	9.532	5.973	5.473	6.708	7.486	9.847	6.46
0.00025	11.177	4.488	3.706	4.096	3.643	4.024	13.206	11.583	9.429	12.466	4.436	6.676	10.325	10.8	10.733	12.855
0.00125	12.773	4.63	3.801	6.028	19.604	9.552	24.812	35.724	9.739	8.172	5.063	6.5	19.352	24.682	13.972	10.671
0.00625	16.022	15.26	10.064	19.024	23.707	9.797	27.838	35.759	14.241	9.6	6.381	6.389	35.659	33.58	24.82	26.684
0.0313	25.551	15.947	16.85	21.106	49.341	22.977	40.852	47.528	17.081	15.117	8.306	10.372	39.227	37.497	65.306	65.743
0.156	31.105	22.772	21.674	29.951	69.986	63.126	73.127	71.74	21.158	27.487	17.814	20.887	71.3	58.285	82.685	87.457
0.781	37.922	27.396	31.271	28.532	81.588	81.199	73.29	74.529	64	57.527	37.924	62.097	83.89	67.744	85.369	92.013
3.91	75.587	87.619	69.5	80.513	94.246	87.539	96.299	91.847	65.911	82.976	76.942	67.82	86.72	81.391	95.748	95.252
1.95	95.834	87.837	81.668	90.59	98.578	88.869	97.981	98.055	96.983	71.345	84.583	85.344	83.024	81.609	98.29	97.182
9.77	94.037	92.733	81.269	89.691	99.634	94.326	94.215	99.488	98.253	71.616	98.837	88.247	97.896	95.407	98.389	98.803

## Sheet: Figure 3
Figure 3a
Inhibition of cell fusion by ACE2-Ig
% Neutralization
	SARS-CoV												SARS-CoV-2
μg/ml	ACE2-Ig				mACE2-Ig				TIGIT-Ig				ACE2-Ig				mACE2-Ig				TIGIT-Ig
0.19	5.431	2.707	9.577	6.664	9.989	5.643	8.076	4.254	4.247	2.679	6.056	6.688	1.543	6.448	8.808	9.324	7.616	1.278	6.591	4.435	4.585	4.869	8.211	8.596
0.39	4.636	2.905	1.477	5.491	3.431	7.336	3.55	2.062	7.62	8.017	2.27	6.538	3.479	2.553	0.763	9.58	2.244	7.579	2.056	7.948	3.966	8.899	8.902	4.738
0.78	2.985	10.299	18.167	32.084	37.995	24.913	27.88	36.627	7.207	9.598	2.803	2.22	23.626	14.347	11.881	25.115	10.581	29.963	16.659	19.348	1.643	8.365	6.953	0.757
1.563	62.574	72.768	66.375	54.819	56.38	69.047	57.469	54.713	0.3	8.422	8.253	4.496	68.375	68.246	61.36	51.913	50.405	60.051	48.825	44.777	6.682	6.562	3.22	4.485
3.125	92.598	84.409	98.523	92.764	93.652	96.427	90.808	88.222	8.303	6.894	7.698	5.911	95.708	87.786	90.554	94.836	90.574	79.533	86.952	87.608	7.147	1.443	0.917	5.255
6.25	82.035	93.608	87.429	95.484	94.746	93.931	98.551	89.844	6.004	9.36	1.992	6.343	90.72	98.129	89.718	92.132	91.239	92.074	72.573	99.811	3.037	2.761	2.335	8.905
12.5	94.02	84.178	91.47	96.704	96.86	89.545	94.213	99.674	8.708	2.641	6.022	9.867	99.097	97.553	94.735	95.686	77.683	92.279	97.687	98.182	7.46	8.803	3.652	3.115
25	82.663	95.499	92.55	93.991	91.328	90.98	91.681	94.1	5.964	0.827	8.315	8.876	84.575	98.975	99.102	93.477	99.294	98.134	96.547	90.678	3.928	4.468	4.246	1.418
50	91.398	98.349	91.667	88.457	99.121	89.708	90.722	99.178	8.547	7.852	7.817	6.877	98.265	91.492	93.969	93.771	99.117	92.897	99.013	97.005	1.933	3.008	5.471	2.39
100	97.491	88.39	91.865	90.188	91.01	99.094	98.987	97.417	7.942	4.397	7.385	6.189	98.051	87.364	90.524	92.114	94.921	99.279	90.832	95.253	9.017	6.959	3.359	1.332

## Sheet: Figure S1
Figure S1
Inhibition of cell fusion by ACE2-Ig
RU
	SARS-CoV spike protein RBD			SARS-CoV-2 spike protein RBD
TIGIT-Ig	12.39	7.69	40.11	14.94	2.06	8.36
ACE2-Ig	469.16	575.84	673.45	787.94	709.28	454.24
mACE2-Ig	679.31	603.27	467.33	604.88	788.43	780.77

## Sheet: Figure S2
Figure S2
Neutralization activity of TIGIT-Ig
% Neutralization
	293T/ACE2								A549/ACE2
μg/ml	SARS-CoV				SARS-CoV-2				SARS-CoV				SARS-CoV-2
5e-05	4.288	6.169	12.726	5.007	3.502	6.736	5.793	8.659	4.509	5.407	4.814	5.464	7.419	8.001	2.525	5.481
0.00025	5.751	6.665	6.654	6.654	2.613	10.556	3.41	8.085	2.028	6.282	3.013	6.066	3.872	5.766	7.835	3.905
0.00125	4.76	0.201	10.154	6.35	0.158	10.163	4.645	1.96	5.384	7.029	2.508	2.977	9.395	7.411	6.926	3.415
0.00625	4.436	0.528	5.077	8.349	4.841	6.696	4.418	4.417	7.027	7.023	3.737	5.643	3.483	4.204	8.727	4.774
0.0313	6.071	1.591	3.825	6.974	5.464	9.178	5.763	6.692	6.766	7.996	5.288	7.643	4.633	7.402	5.26	6.629
0.156	9.272	5.083	7.321	4.355	8.402	7.943	4.866	7.287	2.929	7.332	9.494	7.469	6.715	4.124	1.017	4.895
0.781	3.452	5.738	4.949	9.386	1.713	4.308	6.059	2.094	9.167	6.059	3.734	3.738	7.332	3.615	5.695	3.93
3.91	2.379	4.175	5.932	0.447	0.518	9.072	7.139	3.812	8.169	4.642	6.746	5.679	4.301	8.172	4.636	3.703
1.95	2.011	2.912	9.483	3.487	0.76	5.969	4.024	7.74	7.469	5.72	4.214	5.909	8.756	3.592	6.472	8.954
9.77	3.613	2.861	3.261	3.776	6.727	6.249	5.372	6.777	9.836	6.04	5.012	3.019	8.297	8.447	3.549	2.402
